# Supplementary material for: Poly-carbon chemistry: reactions of the multi-site coordinated diyndiyl ligand in {Fe2(CO)6(μ-PPh2)}2(μ-η1,η2∶μ-η1,η2-CC–CC) with the nucleophiles P(OMe)3 and NHEt2
Source: Royal Society of Chemistry journal article supplement (doi:10.1039/b009797g), 2001-01-01
Supplement: b009797g.doc [file b009797g.doc]

**SUPPLEMENTARY INFORMATION**

**Poly-carbon ligand chemistry: reactions of the multi-site coordinated diyndiyl ligand in {Fe2(CO)6(-PPh2)}2(-1,2:-1,2-CC-CC) with the nucleophiles P(OMe)3 and NHEt2**

Paul J. Low,1 Arthur J. Carty,1,2* Konstantin A. Udachin1 and Gary D. Enright.1

**Reaction of Fe3(CO)12 with Ph2PCCCCPPh2**: A solution of Fe3(CO)12 (3.00 g, 0.596 mmol) in THF (300 ml) was treated with 1,4-bis(diphenylphosphino)buta-1,3-diyne (Ph2PCCCCPPh2) (1.20 g, 0.298 mmol) and the mixture heated at reflux point for 1 h. The reaction mixture was cooled, a small portion of silica gel added, and the solvent removed *in vacuo*. The stained silica gel was then transferred to the top of a silica gel column (hexane). Elution with hexane afforded a dark green band containing Fe3(CO)12 (200 mg), which was followed by a red band (5% CH2Cl­2 in hexane) containing {Fe2(-PPh2)(CO)6}2(-CCCC), which was crystallised from CH2Cl2/MeOH (540 mg, 20%) and identified by comparison of the spectral data with that previously reported. A 200mg scale reaction gave **1** in 35%.

**Reaction of {Fe2(-PPh2)(CO)6}2(-CCCC) with P(OMe)3**: A solution of {Fe2(-PPh2)(CO)6}2(-CCCC) **1** (100 mg, 0.102 mmol) in benzene (10 ml) was treated with P(OMe)3 (0.5 ml, excess) and the reaction mixture stirred at room temperature for 1 h. The solvent was removed, and the residue purified by preparative TLC (30% CH2Cl2 in hexane, repeated development) to afford, in order of elution, a dark green band containing Fe3(CO)12­ (3 mg), a maroon band which was crystallised (CH­2Cl2/MeOH) to give {Fe2(CO)6}[-C{P(OMe)3}C(PPh2)CC]{Fe2(CO)6(-PPh2) (**2**, 28%), an orange band which yielded {Fe­2(-PPh2)(CO)5[P(OMe)3]}(-C2C2){Fe2(-PPh2)(CO)6} after crystallisation from hexane (**5**,6%), a red band which was crystallised (CH2Cl2/MeOH) to afford {Fe­2(-PPh2)(CO)5[P(OMe)3]}2(-C2C2) (**6**, 17%) and several other compounds in smaller amounts which were not adequately characterised. Spectroscopic data: **2** IR (cyclohexane): **(CO) 2061m, 2044vs, 2020s, 2003s, 1997s, 1985s, 1980s, 1958m, 1944w cm-1; 1H NMR (CDCl3): ** 3.01 (d, *J*HP = 11Hz); 6.57 – 7.88 (m, Ph). FAB-MS: 1102, [M]+; 1046 – 794 [M-nCO]+ (n = 1-11). **5** IR (cyclohexane): **(CO) 2071vs, 2046s, 2034m, 2009sh, 2004vs, 1989vs, 1971m, 1947w cm-1. 1H NMR (CDCl3): ** 7.55-7.15 (m, 20H, Ph); 3.51 (d, *J*HP = 9 Hz, 9H, OMe). 31P NMR (CDCl3): ** 174.40 [d, *J*PP = 130 Hz, P(3)(OMe)3]; 142.41 [s, P(2)Ph2]; 142.35 [d, *J*PP = 130Hz, P(1)Ph2]. FAB-MS: 1074, [M]+; 1046 – 766, [M-nCO]+ (n = 1-11). **6** IR (cyclohexane): **(CO) 2052s, 2034m, 2007sh, 1998vs, 1987s, 1965s, 1945m cm-1. 1H NMR (CDCl3): ** 7.62-7.25 (m, 10H, Ph); 3.45 (d, *J*HP = 11 Hz, 9 H, OMe). 31P NMR (CDCl3): ** 173.88 [d, JPP = 140 Hz, P(3,4)(OMe)3], 140.58 (d, *J*PP = 140 Hz, P(1,2)Ph2). FAB-MS: 1170, [M]+; 1142 – 890 [M-nCO]+ (n = 1-10).

**Reaction of {Fe2(-PPh2)(CO)6}2(-CCCC) with NHEt2**: A solution of {Fe2(-PPh2)(CO)6}2(-CCCC) (100 mg, 0.102 mmol) in benzene (10 ml) was treated with NHEt2 (22 mg, 33 l, 0.30 mmol) and allowed to stir for 2 d. After this time the solution was orange-red. The solvent was removed and the residue purified by preparative TLC (50% CH2Cl2 in hexane) to afford two bands. The upper purple band (*R*f 0.7) was crystallised from hexane to yield (**3**, 19%). The lower red band (*R*f 0.3) gave small block-shaped crystals of (**4**, 32%) following crystallisation from CH2Cl2/pentane. **3**: IR (cyclohexane) **(CO) 2058m, 2040vs, 2017s, 2008s, 1988sh, 1984s, 1968s, 1959m, 1943m; FAB-MS: 1023-715, [M-nCO]+ (n = 1-12). **4**: IR (CH2Cl2) **(CO) 2069m, 2047vs, 2011vs, 1998m, 1987sh, 1965m, 1954sh, 1936sh cm-1; FAB-MS: 968, [M-3CO+H]+­; 912, [M-5CO+H]+; 854, [M-7CO]+.
